# Supplementary material for: Highly stretchable, mechanically stable, and weavable reduced graphene oxide yarn with high NO2 sensitivity for wearable gas sensors
Source: PubMed Central journal article supplement — RSC Adv. 2018 Feb 16;8(14):7615–21. doi: 10.1039/c7ra12760j (PMC9078497; doi:10.1039/c7ra12760j), 2018-02-16
Supplement: RA-008-C7RA12760J-s001.pdf [file RA-008-C7RA12760J-s001.pdf]

## Supporting information

# Highly stretchable, mechanically stable, and weavable reduced graphene oxide yarn with high NO<sub>2</sub> sensitivity for wearable gas sensors

Yong Ju Yun,<sup>a</sup> Do Yeob Kim,<sup>b</sup> Won G. Hong,<sup>c</sup> Dong Han Ha,<sup>d</sup> Yongseok Jun<sup>a</sup> and Hyung-Kun Lee<sup>\*b,e</sup>

<sup>a</sup>Department of Energy Engineering, Konkuk University, Seoul, 05029, Republic of Korea

<sup>b</sup>ICT Materials & Components Research Laboratory, Electronics and Telecommunications Research Institute (ETRI), Daejeon, 34129, Republic of Korea

<sup>c</sup>Division of Electron Microscopy Research, Korea Basic Science Institute (KBSI), Daejeon, 34133, Republic of Korea

<sup>d</sup>Quantum Technology Institute, Korea Research Institute of Standards and Science (KRISS), Daejeon, 34113, Republic of Korea

<sup>e</sup>Department of Advanced Device Technology, University of Science & Technology, Daejeon, 34113, Republic of Korea

\*Corresponding e-mail address: hkleee@etri.re.kr

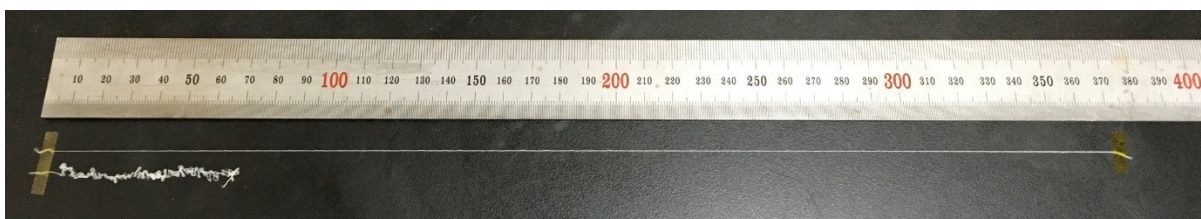

**Fig. S1.** A photograph of pristine polyester-spandex core-spun elastic yarn.

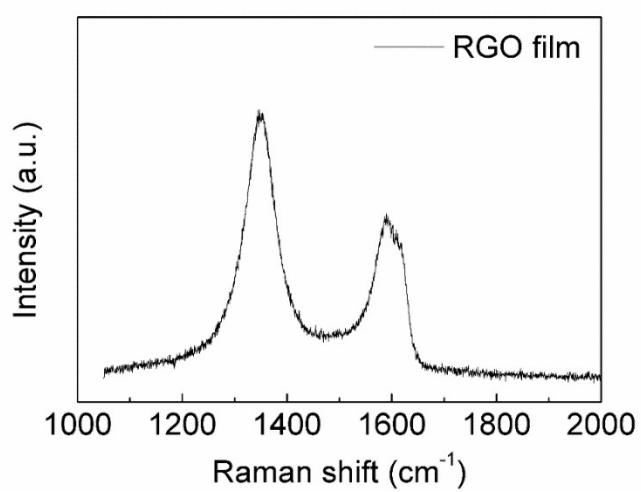

**Fig. S2.** A Raman spectrum of RGO film.

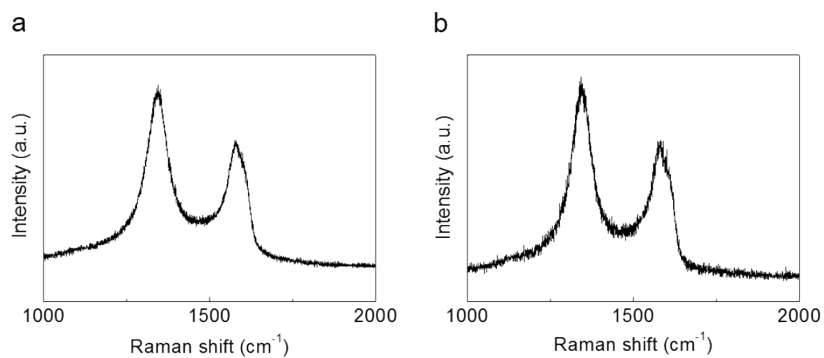

**Fig. S3.** Raman spectra of various areas of a single FRGOEY.

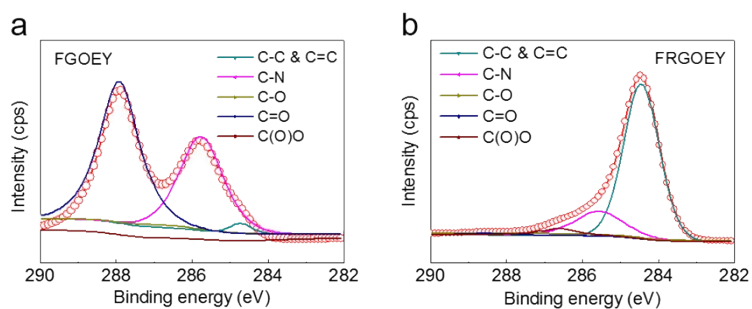

|        |          | C=C & C-C | C-N      | C-O      | C=O      | C(O)O    |
|--------|----------|-----------|----------|----------|----------|----------|
| FGOEY  | position | 284.6     | 285.81   | 286.66   | 287.65   | 288.56   |
|        | Area     | 166690.2  | 19583.68 | 70253.59 | 24130.49 | 15193.2  |
|        | Area %   | 56.3      | 6.6      | 23.7     | 8.2      | 5.2      |
| FRGOEY | position | 284.6     | 285.75   | 286.48   | 287.53   | 288.53   |
|        | Area     | 251932.5  | 27970.78 | 43496.92 | 15005.67 | 10977.32 |
|        | Area %   | 72.2      | 8.0      | 12.4     | 4.3      | 3.1      |

**Fig. S4.** High-resolution XPS C 1s spectra of FGOEY and FRGOEY.

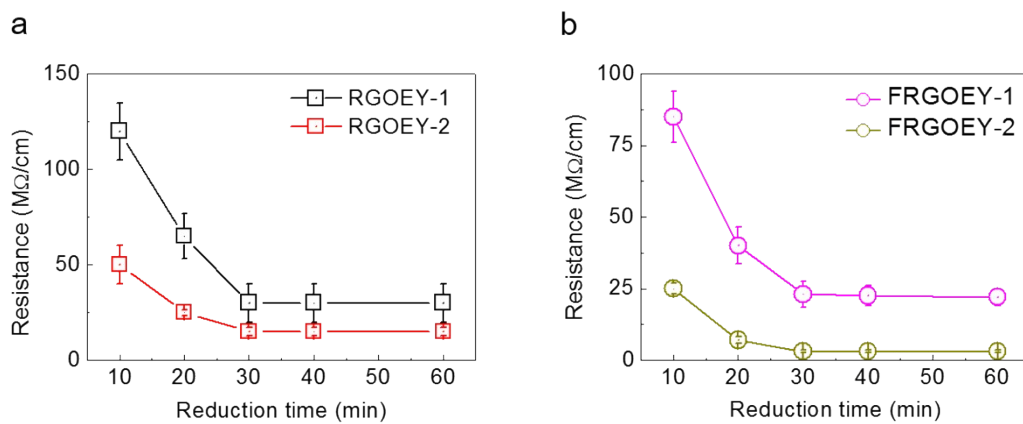

**Fig. S5.** Resistance variations of RGOEYs and FRGOEYs as a function of reduction time.

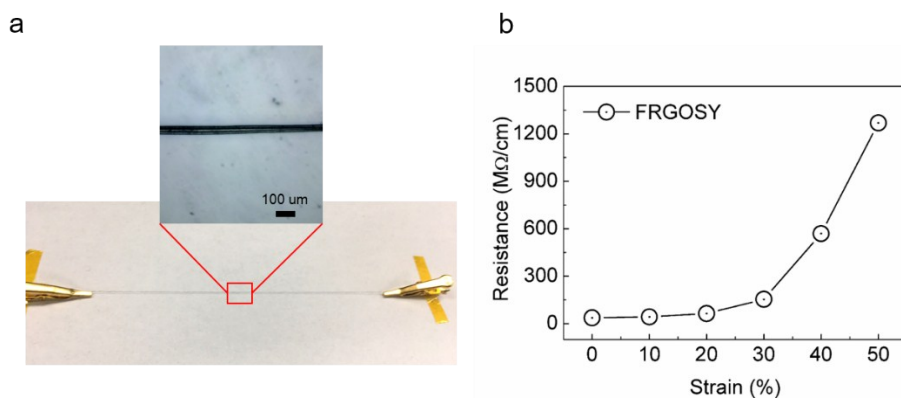

**Fig. S6.** (a) A photograph of the FRGOSY. Inset: an enlarged photograph of Fig. S4a. (b) Relative variations in resistance versus strains for the FRGOSY.

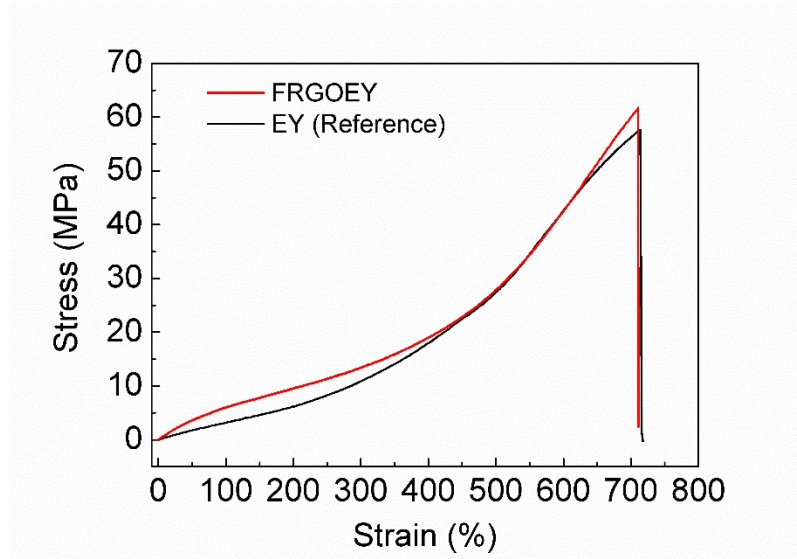

**Fig. S7.** Tensile stress-strain curves for FRGOEY and EY.

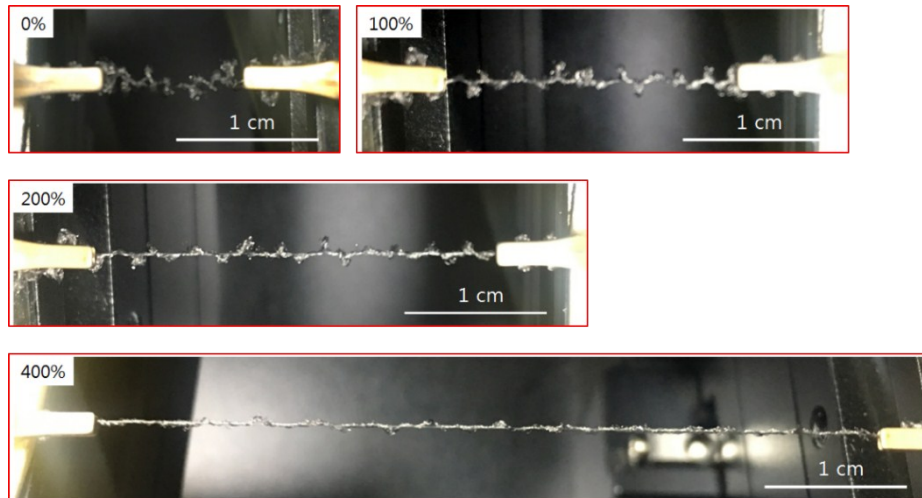

| Strain (%) | Radius of curvature of FRGOEY |
|------------|-------------------------------|
| 0%         | $2.0 \pm 1.0$ mm              |
| 100%       | $1.0 \pm 0.3$ mm              |
| 200%       | $0.45 \pm 0.05$ mm            |
| 400%       | $\infty$                      |

**Fig. S8.** Photographs of FRGOEY during stretching test.

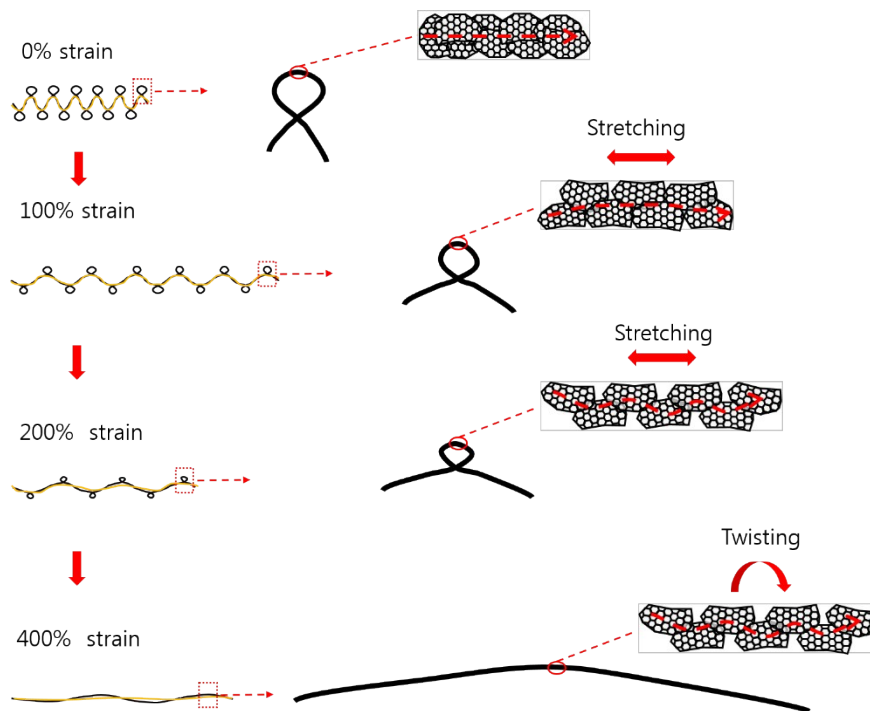

**Fig. S9.** Schematic illustration of the FRGOEY under 0, 100%, 200%, and 400% strains.

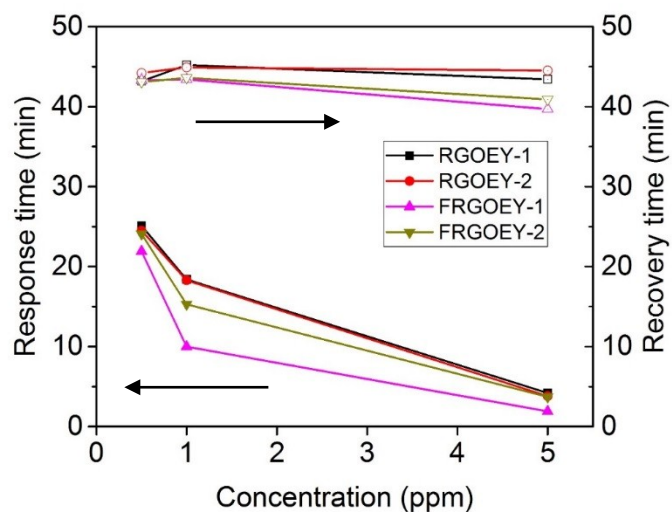

**Figure S10.** Recovery and response time of all samples as a function of  $\text{NO}_2$  concentrations.

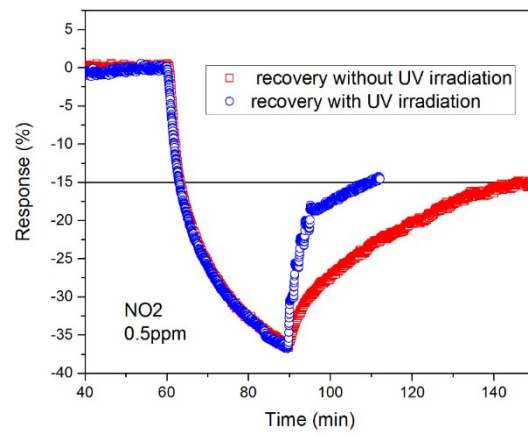

**Fig. S11.** UV irradiation for fast recovery at 57% RH.

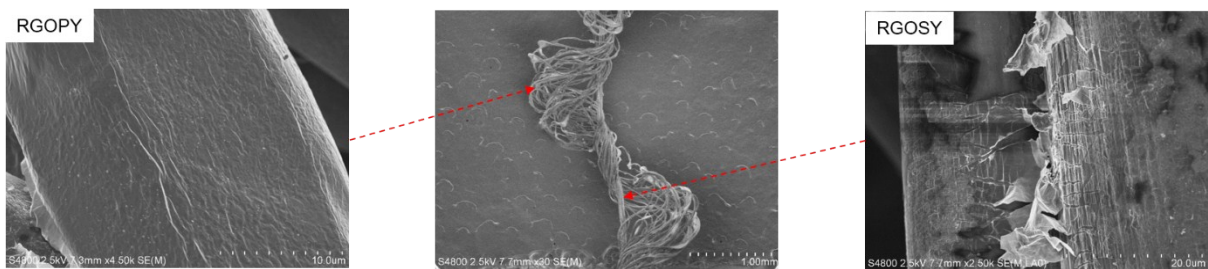

**Fig. S12.** FESEM images of FRGOEY.

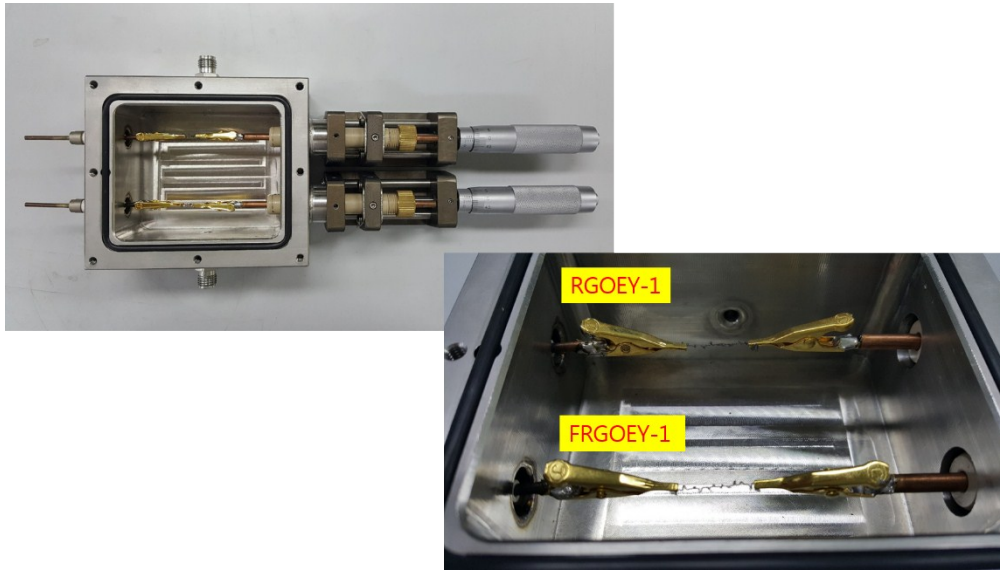

**Fig. S13.** Photographs of RGOEY-1 and FRGOEY-1.

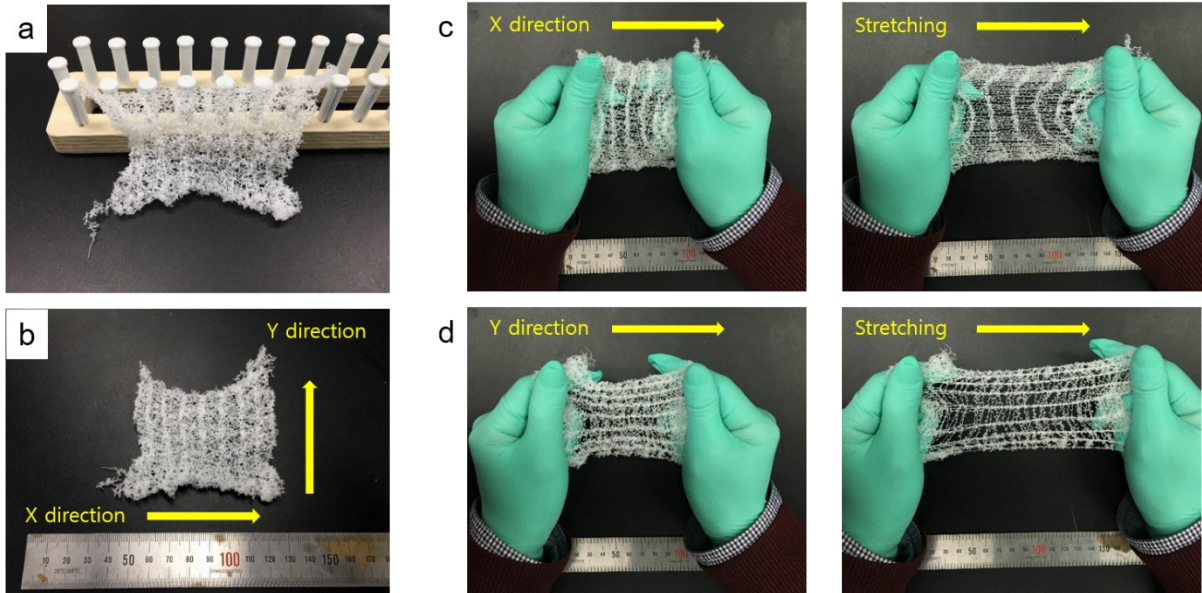

**Fig. S14.** Photographs of knitted fabrics as a wrist-band.
